# Supplementary material for: MetMap Enables Genome-Scale Methyltyping for Determining Methylation States in Populations
Source: PubMed Central journal article supplement (PMC2924245; doi:10.1371/journal.pcbi.1000888), 2010-08-19
Supplement: pcbi.1000888.s002.pdf [file pcbi.1000888.s002.pdf]

|                                         | <b>Sample 1</b> | <b>Sample 2</b> | <b>Sample 3</b> | <b>Sample 4</b> |
|-----------------------------------------|-----------------|-----------------|-----------------|-----------------|
| <b>Reads Sequenced</b>                  | 6,227,749       | 6,202,253       | 6,233,646       | 5,067,711       |
| <b>Alignments at HpaII sites</b>        | 4,536,673       | 4,602,001       | 4,614,571       | 4,465,175       |
| <b>Unique alignments at HpaII sites</b> | 4,160,629       | 4,221,245       | 4,225,504       | 4,066,062       |
